# Supplementary material for: Effects of Different Physical Activity Levels during a Single Day on Energy Intake, Appetite, and Energy Balance: A Preliminary Study
Source: Nutrients. 2019 Mar 23;11(3):690. doi: 10.3390/nu11030690 (PMC6471929; doi:10.3390/nu11030690)
Supplement: Supplementary file 1 [file nutrients-11-00690-s001.pdf]

**Table S1. Buffet items at dinner.**

Participants freely ate the food items until they were satisfied, and the duration of buffet time was from 19:30 to 23:00.

Table S1. Buffet items at dinner (19:30-23:00)

|                               |
|-------------------------------|
| •Beef pastrami                |
| •Curry                        |
| •Fried chicken                |
| •Chocolate cookie             |
| •Butter cookie                |
| •Rice crackers                |
| •Cheese                       |
| •Fish sausage                 |
| •Steamed Chicken              |
| •Bean-starch vermicelli salad |
| •Coleslaw                     |
| •Rice                         |
| •Boiled eggs                  |
| •Dumplings                    |
| •A piece of cake (Baumkuchen) |
